# Supplementary material for: Trinuclear Mn2+/Zn2+ based microporous coordination polymers as efficient catalysts for ipso-hydroxylation of boronic acids
Source: Royal Society of Chemistry journal article supplement (doi:10.1039/d0dt00794c), 2020-01-01

## Electronic Supporting Information

### **Trinuclear Mn<sup>2+</sup>/Zn<sup>2+</sup> based microporous coordination polymers as efficient catalysts for *ipso*-hydroxylation of boronic acids**

Sanchay J. Bora,<sup>\*a</sup> Rima Paul,<sup>a</sup> Anurag Dutta,<sup>b</sup> Shyam Goswami,<sup>a</sup> Ankur K. Guha<sup>c</sup> and Ashim J. Thakur<sup>b</sup>

<sup>1</sup>Department of Chemistry, Pandu College, Guwahati-781012, Assam, India

<sup>2</sup>Department of Chemistry, Tezpur University, Napaam, Tezpur-784028, Assam, India

<sup>2</sup>Department of Chemistry, Cotton University, Guwahati-781001, Assam, India

E-mail: [sanchay.bora@gmail.com](mailto:sanchay.bora@gmail.com)

**Table S1.** Selected bond distances (Å) and angles (°) for compounds **1** and **2**.

| <b>Bond Parameters</b> | <b>[Mn<sub>3</sub>(bpdc)<sub>3</sub>(bipy)].2NO<sub>3</sub> (<b>1</b>)</b> | <b>[Zn<sub>3</sub>(bpdc)<sub>3</sub>(bipy)].2NO<sub>3</sub>.4H<sub>2</sub>O (<b>2</b>)</b> |
|------------------------|----------------------------------------------------------------------------|--------------------------------------------------------------------------------------------|
| <b>Distances/Å</b>     |                                                                            |                                                                                            |
| M(1)-O(1)              | 1.9599(1)                                                                  | 1.9526(3)                                                                                  |
| M(1)-O(2)              | 1.9441(1)                                                                  | 1.9371(3)                                                                                  |
| M(1)-O(3)              | 1.9407(1)                                                                  | 1.9341(3)                                                                                  |
| M(1)-N(1)              | 2.0685(1)                                                                  | 2.0629(3)                                                                                  |
| M(2)-O(4A)             | 2.0483(1)                                                                  | 2.0535(5)                                                                                  |
| M(2)-O(4B)             | 2.1449(1)                                                                  | 2.1087(5)                                                                                  |
| M(2)-O(5A)             | 2.1137(1)                                                                  | 2.0348(4)                                                                                  |
| M(2)-O(5B)             | 2.0520(1)                                                                  | 2.0643(5)                                                                                  |
| M(2)-O(6A)             | 2.0478(1)                                                                  | 2.0536(5)                                                                                  |
| M(2)-O(6B)             | 2.0607(1)                                                                  | 2.1354(5)                                                                                  |
| <b>Angles/°</b>        |                                                                            |                                                                                            |
| M(1)-O(1)-C(1)         | 109.914(7)                                                                 | 109.868(2)                                                                                 |
| M(1)-O(2)-C(2)         | 126.656(5)                                                                 | 124.459(2)                                                                                 |
| M(1)-O(3)-C(3)         | 124.965(5)                                                                 | 126.110(3)                                                                                 |
| M(2)-O(6A)-C(3)        | 132.159(5)                                                                 | 143.229(3)                                                                                 |
| M(2)-O(6B)-C(3)        | 131.172(5)                                                                 | 137.348(3)                                                                                 |
| M(2)-O(5A)-C(2)        | 123.470(5)                                                                 | 133.414(3)                                                                                 |
| M(2)-O(5B)-C(2)        | 128.044(5)                                                                 | 130.807(4)                                                                                 |
| M(2)-O(4A)-C(1)        | 146.422(7)                                                                 | 126.626(4)                                                                                 |
| M(2)-O(4B)-C(1)        | 136.577(7)                                                                 | 123.685(3)                                                                                 |
| O(1)-M(1)-N(1)         | 106.033(6)                                                                 | 105.810(2)                                                                                 |
| O(2)-M(1)-N(1)         | 97.479(5)                                                                  | 97.421(2)                                                                                  |
| O(3)-M(1)-N(1)         | 96.139(5)                                                                  | 95.939(2)                                                                                  |
| O(1)-M(1)-O(2)         | 113.875(4)                                                                 | 113.013(1)                                                                                 |
| O(1)-M(1)-O(3)         | 120.777(4)                                                                 | 121.524(2)                                                                                 |
| O(2)-M(1)-O(3)         | 116.629(3)                                                                 | 117.032(2)                                                                                 |

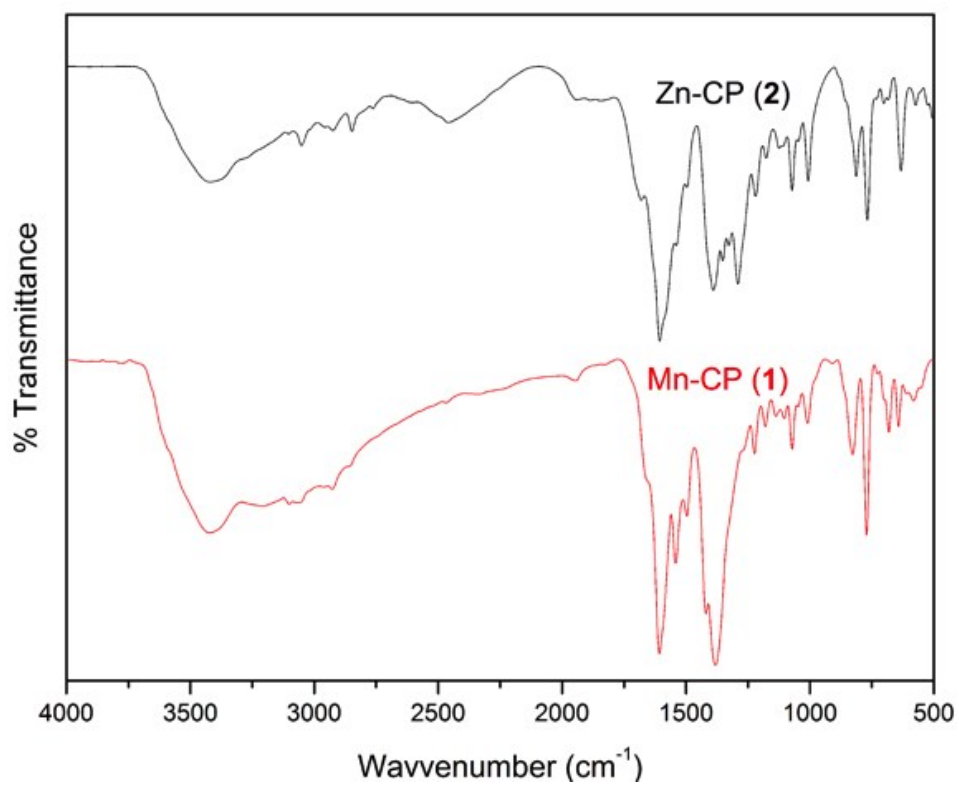

**Figure S1.** FT-IR (KBr phase) spectrum of  $[\text{Mn}(\text{bpdc})_3(\text{bipy})] \cdot 2\text{DMF}$  (**1**) and  $[\text{Zn}(\text{bpdc})_3(\text{bipy})] \cdot 2\text{DMF} \cdot 4\text{H}_2\text{O}$  (**2**)

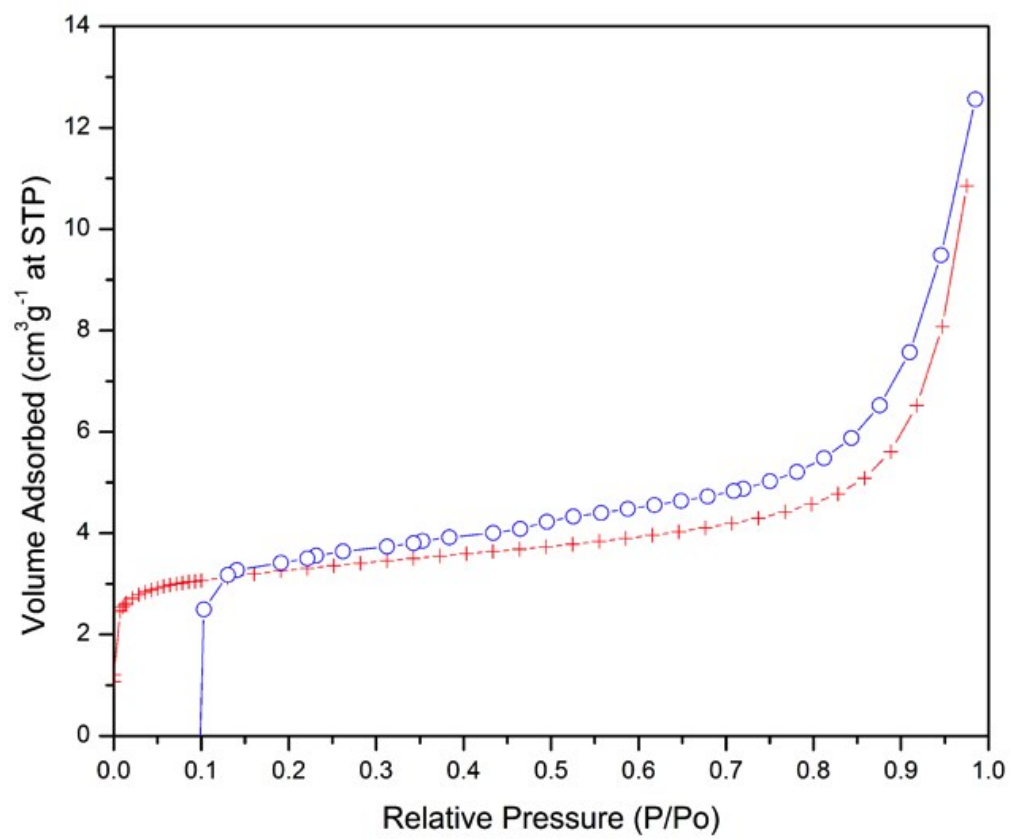

**Figure S2.** BET surface area curve of  $[\text{Zn}(\text{bpdc})_3(\text{bipy})] \cdot 2\text{DMF} \cdot 4\text{H}_2\text{O}$  (2)

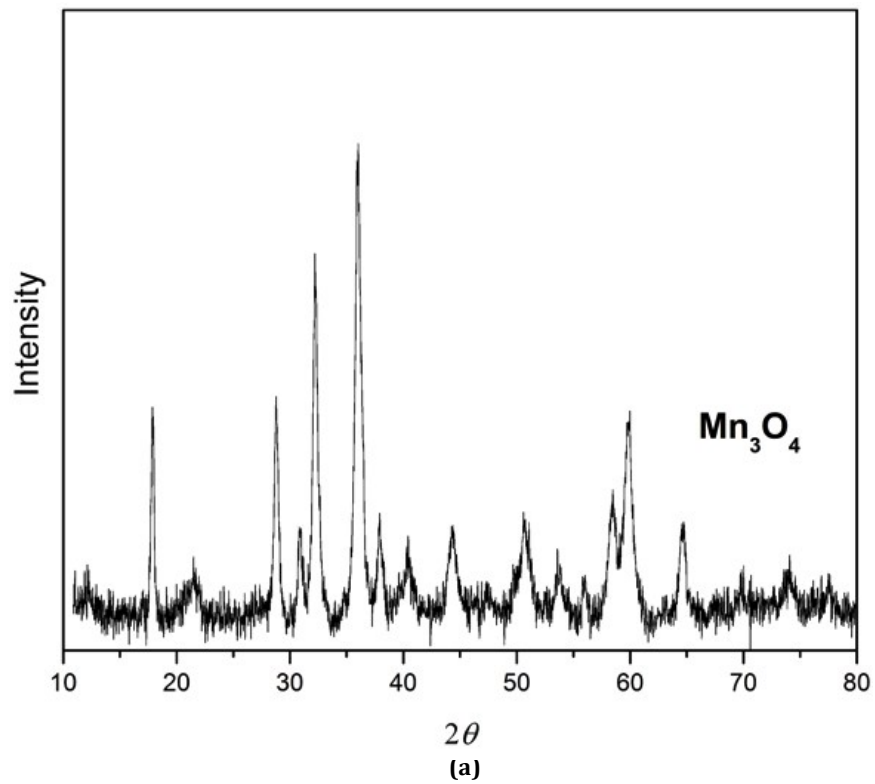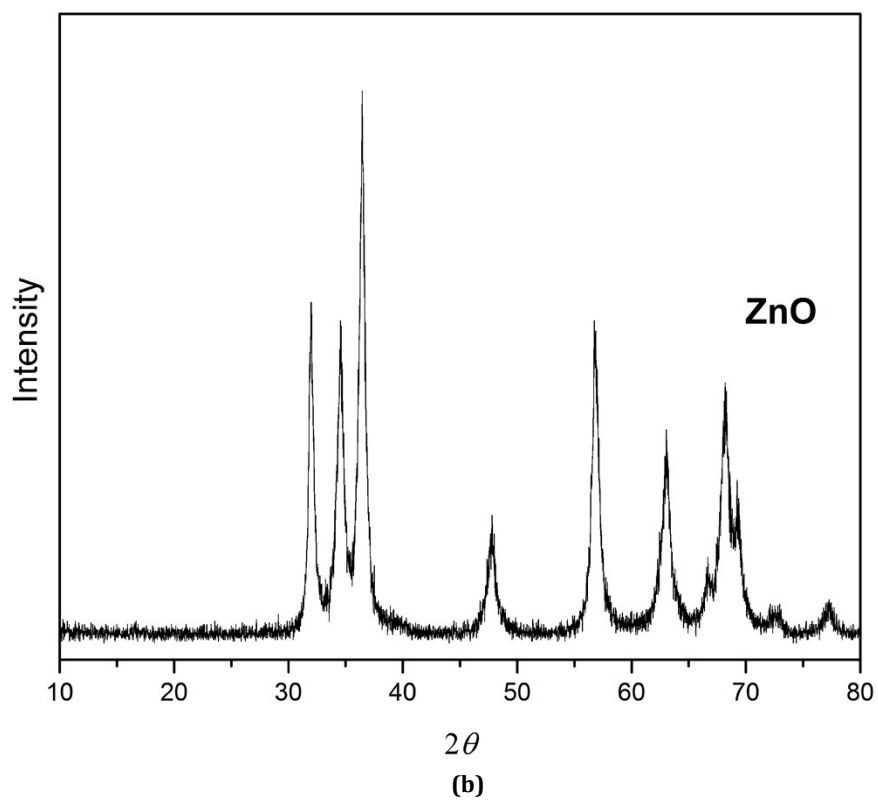

**Figure S3.** Indexed PXRD patterns for calcined products of (a)  $[Mn(bpdc)_3(bipy)] \cdot 2DMF$  (**1**) and (b)  $[Zn(bpdc)_3(bipy)] \cdot 2DMF \cdot 4H_2O$  (**2**)

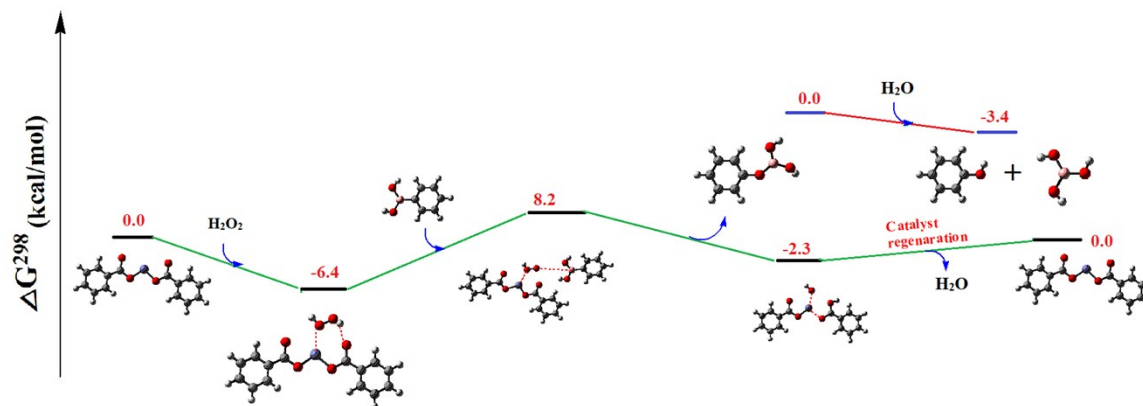

**Figure S4.** Energetics of the  $[\text{Zn}(\text{bpdC})_3(\text{bipy})]\cdot 2\text{DMF}\cdot 4\text{H}_2\text{O}$  (**2**) catalyzed *ipso*-hydroxylation of phenyl boronic acid.

## NMR data

$^1\text{H}$  and  $^{13}\text{C}$  NMR spectra were recorded with a JNM ECS 400 MHz NMR spectrophotometer (JEOL) using deuterated Chloroform ( $\text{CDCl}_3$ ) and tetramethylsilane (TMS) as the internal standard. Chemical shift values are expressed in ppm. Coupling constants are expressed in Hertz (Hz). The signals are reported as “s”= singlet, “b”= broad, “d”= doublet, “t”= triplet, “q”= quartet and “m”= multiplet.

- a. **Phenol:** (Entry I, Table 3):  $^1\text{H}$  NMR (400 MHz,  $\text{CDCl}_3$ , ppm):  $\delta$  7.24 (d,  $J$ = 8Hz, 2H), 6.81 (d,  $J$ = 8Hz, 3H), 4.23 (s, br, 1H);  $^{13}\text{C}$  NMR (100 MHz,  $\text{CDCl}_3$ , ppm):  $\delta$  155.4, 129.6, 120.8, 115.3
- b. **4-nitrophenol:** (Entry II, Table 3):  $^1\text{H}$  NMR (400 MHz,  $\text{CDCl}_3$ , ppm):  $\delta$  8.15 (d,  $J$ = 8Hz, 2H), 6.91 (d,  $J$ = 8Hz, 2H), 5.94 (s, br, 1H);  $^{13}\text{C}$  NMR (100 MHz,  $\text{CDCl}_3$ , ppm):  $\delta$  161.8, 141.7, 126.4, 115.8
- c. **4-aminophenol:** (Entry III, Table 3):  $^1\text{H}$  NMR (400 MHz,  $\text{CDCl}_3$ , ppm):  $\delta$  8.34 (s, br, 1H), 6.46 (d,  $J$ = 8Hz, 2H), 6.43 (d,  $J$ = 8Hz, 2H), 4.46 (s, br, 1H);  $^{13}\text{C}$  NMR (100 MHz,  $\text{CDCl}_3$ , ppm):  $\delta$  148.7, 141.0, 116.0, 115.6

- d. 4-methoxyphenol:** (Entry IV, Table 3):  $^1\text{H}$  NMR (400 MHz,  $\text{CDCl}_3$ , ppm):  $\delta$  6.75-6.78 (m, 4H), 4.42 (s, br, 1H), 3.72 (s, 3H);  $^{13}\text{C}$  NMR (100 MHz,  $\text{CDCl}_3$ , ppm):  $\delta$  153.8, 149.5, 116.1, 114.9, 55.6
- e. 2-methylphenol:** (Entry V, Table 3):  $^1\text{H}$  NMR (400 MHz,  $\text{CDCl}_3$ , ppm):  $\delta$  7.09-7.11 (m, 2H), 6.81-6.85 (m, 1H), 6.75 (d,  $J=8\text{Hz}$ , 1H), 5.19 (s, br, 1H), 2.29 (s, 3H);  $^{13}\text{C}$  NMR (100 MHz,  $\text{CDCl}_3$ , ppm):  $\delta$  155.5, 139.9, 129.5, 121.6, 116.1, 102.5, 29.8, 21.4, 15.6
- f. 2, 6-dimethylphenol:** (Entry VI, Table 3):  $^1\text{H}$  NMR (400 MHz,  $\text{CDCl}_3$ , ppm):  $\delta$  6.96-6.98 (m, 2H), 6.76 (d,  $J=8\text{Hz}$ , 1H), 4.7 (s, br, 1H), 2.27-2.22 (m, 6H);  $^{13}\text{C}$  NMR (100 MHz,  $\text{CDCl}_3$ , ppm):  $\delta$  152.2, 128.6, 123.0, 120.2, 15.9
- g. 3-methylphenol:** (Entry VII, Table 3):  $^1\text{H}$  NMR (400 MHz,  $\text{CDCl}_3$ , ppm):  $\delta$  7.09-7.11 (m, 1H), 6.73-6.75 (m, 1H), 6.65-6.66 (m, 2H), 4.31 (s, br, 1H), 2.29 (s, 3H);  $^{13}\text{C}$  NMR (100 MHz,  $\text{CDCl}_3$ , ppm):  $\delta$  155.5, 139.9, 129.5, 121.6, 116.1, 112.4, 21.4
- h. 3-cyanophenol:** (Entry VIII, Table 3):  $^1\text{H}$  NMR (400 MHz,  $\text{CDCl}_3$ , ppm):  $\delta$  7.32-7.34 (m, 2H), 7.26-7.24 (m, 1H), 7.12 (m, 1H), 5.75 (s, br, 1H);  $^{13}\text{C}$  NMR (100 MHz,  $\text{CDCl}_3$ , ppm):  $\delta$  156.0, 130.7, 124.7, 120.6, 118.7, 113.1
- i. 4-chlorophenol:** (Entry IX, Table 3):  $^1\text{H}$  NMR (400 MHz,  $\text{CDCl}_3$ , ppm):  $\delta$  7.18 (d,  $J=8\text{Hz}$ , 2H), 6.76 (d,  $J=8\text{Hz}$ , 2H), 5.0 (s, br, 1H);  $^{13}\text{C}$  NMR (100 MHz,  $\text{CDCl}_3$ , ppm):  $\delta$  154.2, 129.5, 125.6, 116.7
- j. 4-formylphenol:** (Entry X, Table 3):  $^1\text{H}$  NMR (400 MHz,  $\text{CDCl}_3$ , ppm):  $\delta$  9.86 (s, 1H), 7.81 (d,  $J=8.4\text{Hz}$ , 2H), 6.98 (d,  $J=8.4\text{Hz}$ , 2H), 6.59 (s, br, 1H) 2.20 (acetone);  $^{13}\text{C}$  NMR (100 MHz,  $\text{CDCl}_3$ , ppm):  $\delta$  191.4, 161.7, 132.6, 129.8, 116.1
- k. 4-ethylphenol:** (Entry XI, Table 3):  $^1\text{H}$  NMR (400 MHz,  $\text{CDCl}_3$ , ppm):  $\delta$  7.05 (d,  $J=8\text{Hz}$ , 2H), 6.76 (d,  $J=8\text{Hz}$ , 2H), 4.18 (s, br, 1H), 2.57 (q,  $J=8\text{Hz}$ , 2H), 1.20 (t,  $J=8\text{Hz}$ , 3H);  $^{13}\text{C}$  NMR (100 MHz,  $\text{CDCl}_3$ , ppm):  $\delta$  153.5, 136.3, 128.9, 115.3, 28.0, 15.9
- l. 4-tert-butylphenol:** (Entry XII, Table 3):  $^1\text{H}$  NMR (400 MHz,  $\text{CDCl}_3$ , ppm):  $\delta$  7.26 (d,  $J=7.2\text{Hz}$ , 2H), 6.75 (d,  $J=7.2\text{Hz}$ , 2H), 1.29 (s, 9H);  $^{13}\text{C}$  NMR (100 MHz,  $\text{CDCl}_3$ , ppm):  $\delta$  153.1, 143.6, 126.2, 114.8, 34.1, 31.6
- m. 2, 4-difluorophenol:** (Entry XIII, Table 3):  $^1\text{H}$  NMR (400 MHz,  $\text{CDCl}_3$ , ppm):  $\delta$  6.96-6.99 (m, 1H), 6.68-6.69 (m, 1H), 6.52-6.55 (m, 1H), 2.92 (s, br, 1H);  $^{13}\text{C}$  NMR (100 MHz,  $\text{CDCl}_3$ , ppm):  $\delta$  152.1, 143.7, 117.4, 110.8, 105, 104.8

- n. **2-hydroxythiophene:** (Entry XIV, Table 3):  $^1\text{H}$  NMR (400 MHz,  $\text{CDCl}_3$ , ppm):  $\delta$  6.96-6.99 (m, 1H), 6.68-6.69 (m, 1H), 6.52-6.55 (m, 1H), 2.92 (s, br, 1H);  $^{13}\text{C}$  NMR (100 MHz,  $\text{CDCl}_3$ , ppm):  $\delta$  152.1, 143.7, 117.4, 110.8, 105, 104.8
- o. **6-methoxypyridine-3-ol:** (Entry XV, Table 3):  $^1\text{H}$  NMR (400 MHz,  $\text{CDCl}_3$ , ppm):  $\delta$  7.75-7.76 (m, 1H), 7.36 (s, br, 1H), 7.24-7.27 (m, 1H), 6.69-6.71 (m, 1H), 3.86 (s, 3H);  $^{13}\text{C}$  NMR (100 MHz,  $\text{CDCl}_3$ , ppm):  $\delta$  158.4, 148.3, 132.2, 128.8, 111.0, 54.2

## Representative $^1\text{H}$ and $^{13}\text{C}$ NMR spectra

Product: 4-ethylphenol

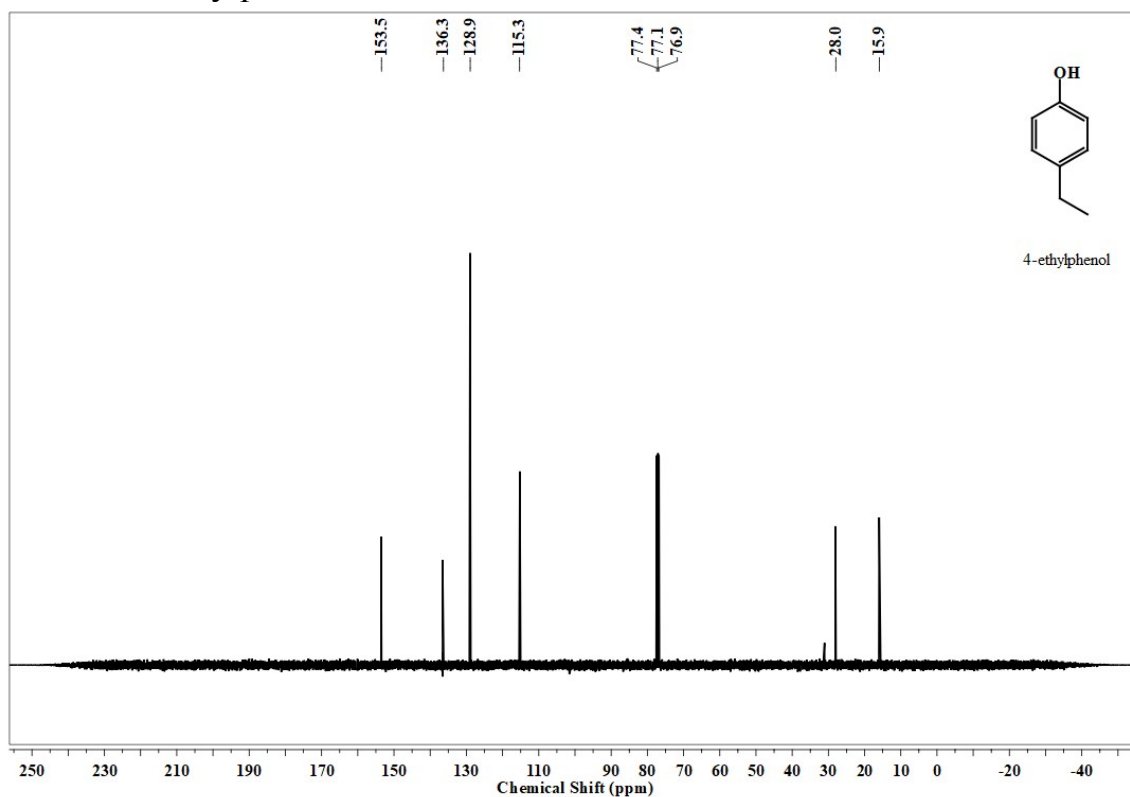



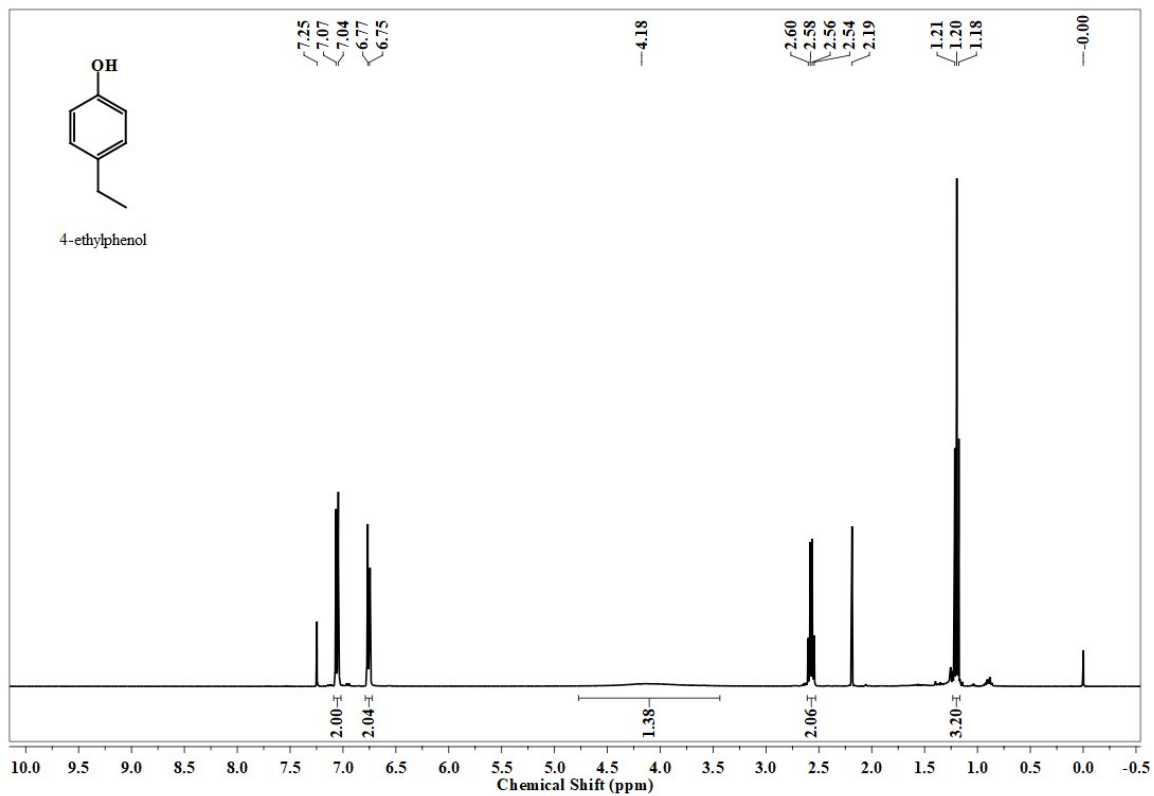

Supplement: d0dt00794c1.pdf [file d0dt00794c1.pdf]
